# Supplementary material
Source: PubMed Central journal article supplement (PMC6980454)
Supplement: NIHMS1537422-supplement-2.pdf [file NIHMS1537422-supplement-2.pdf]

Full Cox proportional hazard model for Figure 2A

|                       | p Value | Hazard Ratio | Lower 95% CI | Upper 95% CI |
|-----------------------|---------|--------------|--------------|--------------|
| non-Black vs. Black   | 0.774   | 0.960        | 0.729        | 1.266        |
| Age                   | 0.016   | 1.015        | 1.003        | 1.028        |
| Ever smoker vs. never | 0.115   | 1.388        | 0.923        | 2.086        |
| Stage                 |         |              |              |              |
| III vs. I+II          | <0.001  | 3.094        | 1.787        | 5.355        |
| IV vs. I+II           | <0.001  | 9.030        | 5.608        | 14.540       |
| Female vs. Male       | 0.329   | 0.872        | 0.663        | 1.148        |
| Weight                | 0.629   | 0.998        | 0.989        | 1.007        |

Full Cox proportional hazard model for Figure 2B

|                       | p Value | Hazard Ratio | Lower 95% CI | Upper 95% CI |
|-----------------------|---------|--------------|--------------|--------------|
| non-Black vs. Black   | 0.001   | 0.329        | 0.169        | 0.639        |
| Age                   | 0.098   | 1.023        | 0.996        | 1.051        |
| Ever smoker vs. never | 0.167   | 1.532        | 0.837        | 2.805        |
| Stage                 |         |              |              |              |
| III vs. I+II          | 0.524   | 0.684        | 0.213        | 2.198        |
| IV vs. I+II           | 0.006   | 3.263        | 1.406        | 7.571        |
| Female vs. Male       | 0.110   | 0.580        | 0.297        | 1.130        |
| Weight                | 0.013   | 0.973        | 0.952        | 0.994        |

Full Cox proportional hazard model for Figure 3A

|                       | p Value | Hazard Ratio | Lower 95% CI | Upper 95% CI |
|-----------------------|---------|--------------|--------------|--------------|
| non-Black vs. Black   | 0.074   | 0.474        | 0.208        | 1.076        |
| Age                   | 0.090   | 1.030        | 0.995        | 1.066        |
| Ever smoker vs. never | 0.057   | 2.032        | 0.979        | 4.219        |
| Stage                 |         |              |              |              |
| III vs. I+II          | 0.149   | 0.186        | 0.019        | 1.829        |
| IV vs. I+II           | 0.003   | 5.381        | 1.762        | 16.435       |
| Female vs. Male       | 0.311   | 0.673        | 0.314        | 1.446        |
| Weight                | 0.257   | 0.986        | 0.963        | 1.010        |

Full Cox proportional hazard model for Figure 3B

|                       | p Value | Hazard Ratio | Lower 95% CI | Upper 95% CI |
|-----------------------|---------|--------------|--------------|--------------|
| non-Black vs. Black   | 0.008   | 0.053        | 0.006        | 0.464        |
| Age                   | 0.180   | 1.047        | 0.979        | 1.119        |
| Ever smoker vs. never | 0.555   | 1.980        | 0.205        | 19.123       |
| Stage                 |         |              |              |              |
| III vs. I+II          | 0.096   | 5.434        | 0.742        | 39.788       |
| IV vs. I+II           | 0.053   | 11.789       | 0.970        | 143.241      |
| Female vs. Male       | 0.413   | 0.496        | 0.092        | 2.663        |
| Weight                | 0.014   | 0.869        | 0.777        | 0.972        |

Full Cox proportional hazard model for Figure 3C

|                       | p Value | Hazard Ratio | Lower 95% CI | Upper 95% CI |
|-----------------------|---------|--------------|--------------|--------------|
| non-Black vs. Black   | 0.001   | 0.095        | 0.025        | 0.369        |
| Age                   | 0.012   | 1.083        | 1.018        | 1.153        |
| Ever smoker vs. never | 0.012   | 7.136        | 1.527        | 33.355       |
| Female vs. Male       | 0.293   | 0.484        | 0.125        | 1.872        |
| Weight                | 0.067   | 0.965        | 0.929        | 1.002        |

Full Cox proportional hazard model for Figure 3D

|                       | p Value | Hazard Ratio | Lower 95% CI | Upper 95% CI |
|-----------------------|---------|--------------|--------------|--------------|
| non-Black vs. Black   | 0.044   | 0.419        | 0.179        | 0.978        |
| Age                   | 0.456   | 1.011        | 0.982        | 1.042        |
| Ever smoker vs. never | 0.790   | 1.117        | 0.495        | 2.522        |
| Female vs. Male       | 0.195   | 0.600        | 0.277        | 1.298        |
| Weight                | 0.078   | 0.974        | 0.947        | 1.003        |

Full Cox proportional hazard model for Figure 4A. Forward Stepwise (Conditional LR) was used.

|                               | p Value | Hazard Ratio | Lower 95% CI | Upper 95% CI |
|-------------------------------|---------|--------------|--------------|--------------|
| Variables in the Equation     |         |              |              |              |
| Weight                        | 0.040   | 0.285        | 0.086        | 0.943        |
| Variables not in the Equation |         |              |              |              |
| Ever smoker vs. never         | 0.419   |              |              |              |
| Female vs. Male               | 0.755   |              |              |              |
| Age                           | 0.297   |              |              |              |
| Weight                        | 0.875   |              |              |              |
